# Supplementary material for: Visualization of exhaled hydrogen sulphide on test paper with an ultrasensitive and time-gated luminescent probe
Source: Royal Society of Chemistry journal article supplement (doi:10.1039/c6an00830e), 2016-01-01
Supplement: c6an00830e1.pdf [file c6an00830e1.pdf]

Supporting Information:

## Visualization of Exhaled Hydrogen Sulfide on Test Paper with an Ultrasensitive and Time-Gated Luminescent Probe

Ruilong Zhang, Shijiang Liu, Jianping Wang, Guangmei Han, Linlin Yang, Bianhua Liu,\* Guijian Guan and Zhongping Zhang\*

*E-mail:* bhliu@iim.ac.cn; zpzhang@iim.ac.cn.

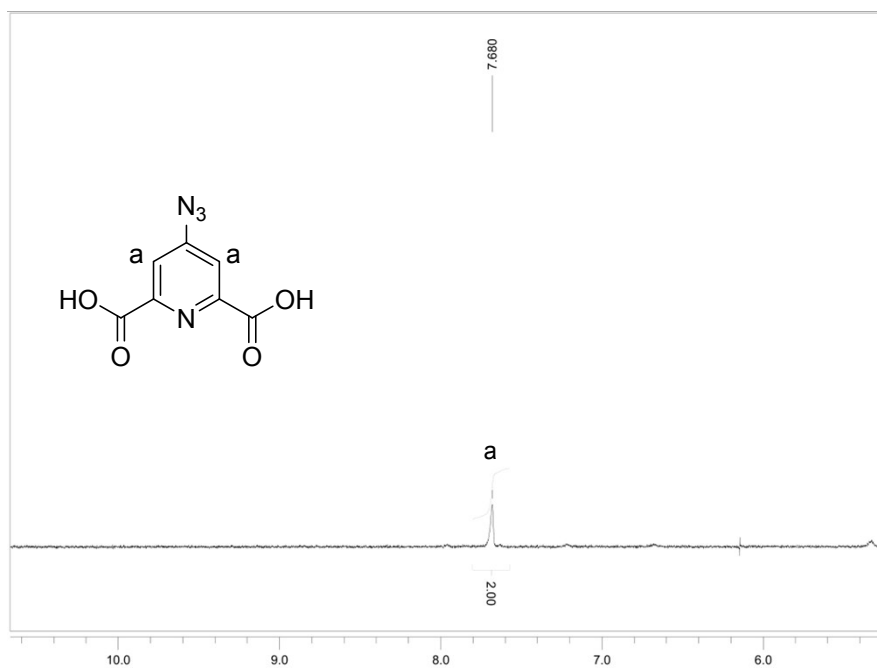

**Fig. S1** <sup>1</sup>H NMR spectrum of DPA-N<sub>3</sub>.

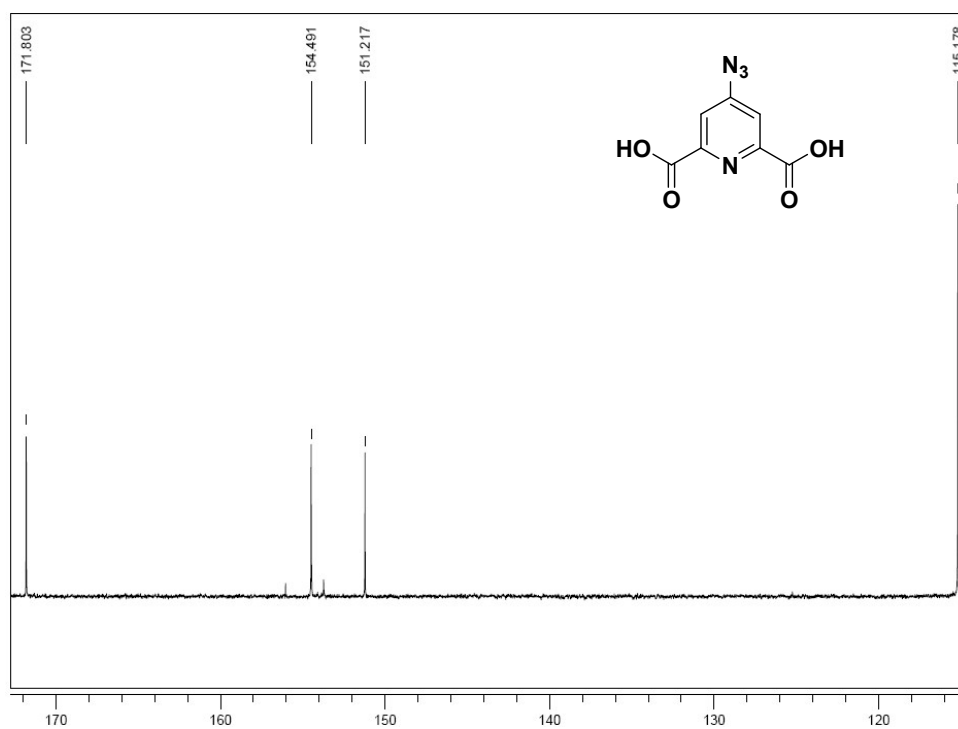

Fig. S2 <sup>13</sup>C NMR spectrum of DPA-N<sub>3</sub>.

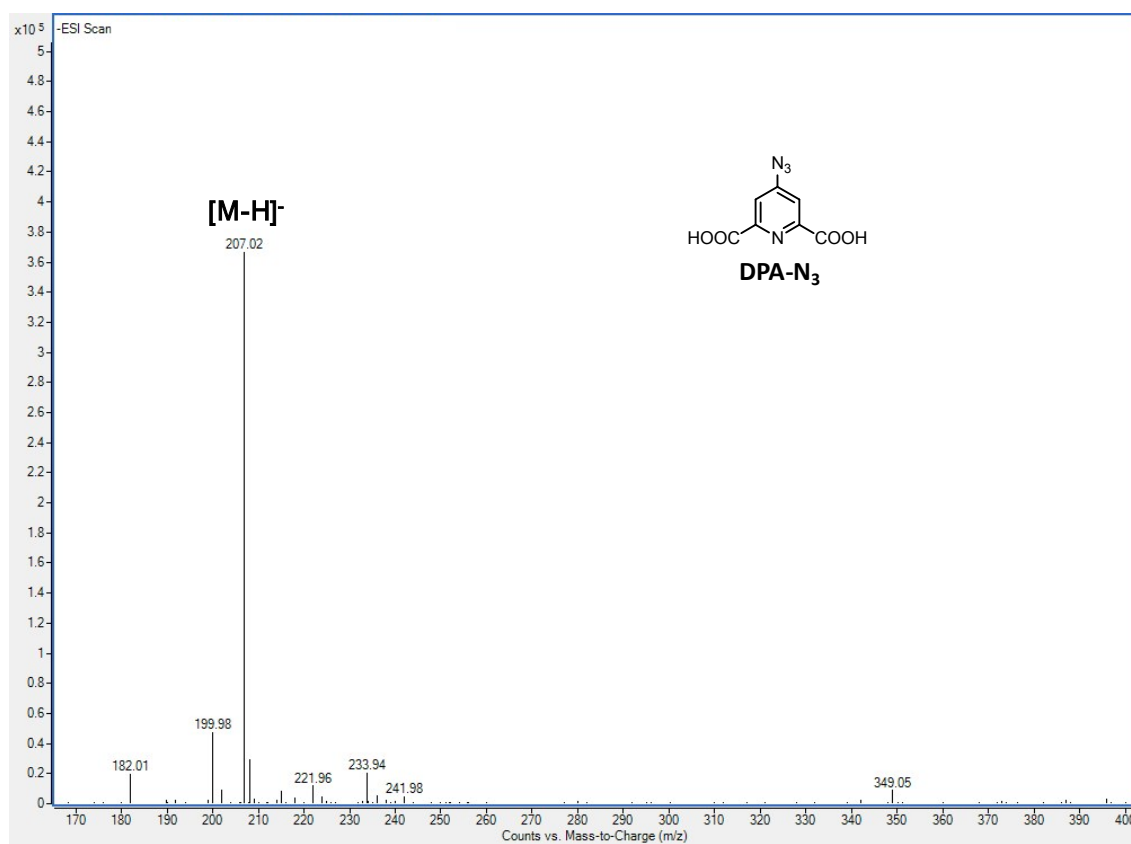

Fig. S3 MS spectrum of DPA-N<sub>3</sub>.

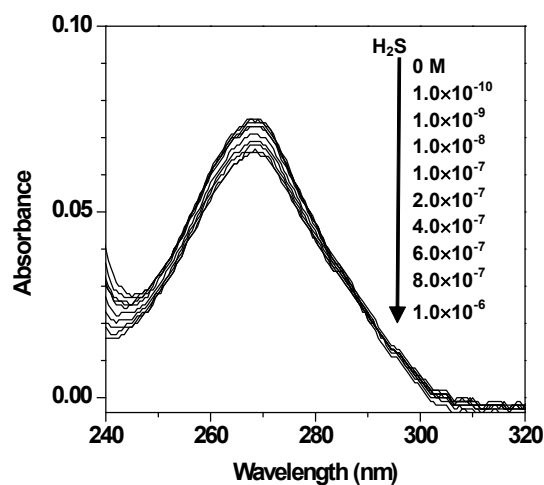

**Fig. S4** UV-visible absorption spectra of the probe  $\text{Na}_3[\text{Tb}(\text{DPA}-\text{N}_3)_3]$  with the addition of  $\text{H}_2\text{S}$ .

**Tab. S1.** The setting of Cary Eclipse fluorescence spectrophotometer for the  $\text{H}_2\text{S}$  detection using probe  $\text{Na}_3[\text{Tb}(\text{DPA}-\text{N}_3)_3]$ .

|                             |                           |
|-----------------------------|---------------------------|
| Mode: Phosphorescence       | Excitation: 280 nm        |
| Total decay: 0.02 s         | Delay: 0.1 ms             |
| Gate: 2 ms                  | PMT voltage: 600 V        |
| Excitation slit width: 5 nm | Emission slit width: 5 nm |

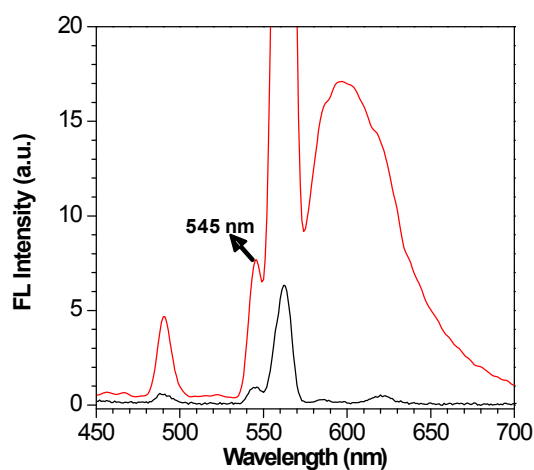

**Fig. S5** The steady-state fluorescent spectra of  $\text{Na}_3[\text{Tb}(\text{DPA}-\text{N}_3)_3]$  before (black curve) and after (green curve) the addition of  $\text{H}_2\text{S}$  with the excitation of 280 nm.

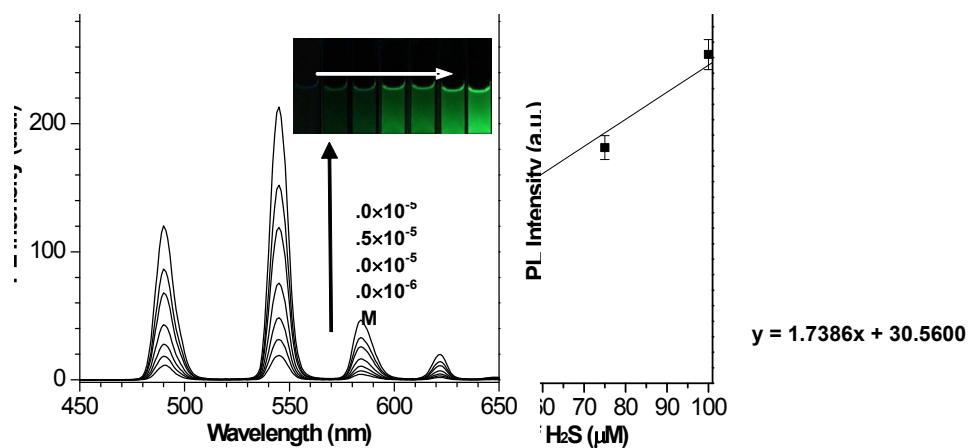

**Fig. S6** (A) Time-gated luminescent spectra of  $\text{Na}_3[\text{Tb}(\text{DPA}-\text{N}_3)_3]$  (50  $\mu\text{M}$ ) with the addition of  $\text{H}_2\text{S}$  at the excitation wavelength of 280 nm. The insets are the corresponding photographs under a 254 nm UV lamp. (B) The plots of luminescence enhancement at 545 nm versus  $\text{H}_2\text{S}$  concentrations.

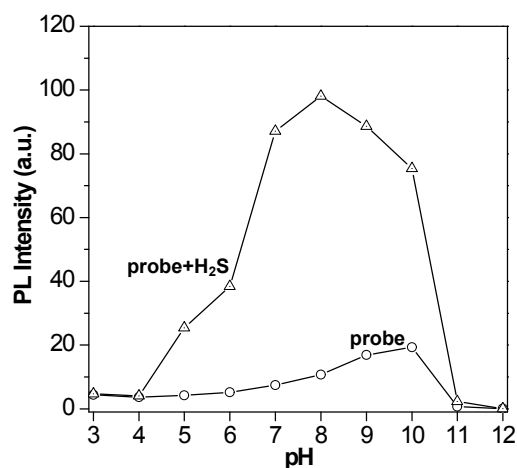

**Fig. S7** pH Effects of  $\text{Na}_3[\text{Tb}(\text{DPA}-\text{N}_3)_3]$  (50  $\mu\text{M}$ ) response to  $\text{H}_2\text{S}$  (25  $\mu\text{M}$ ).

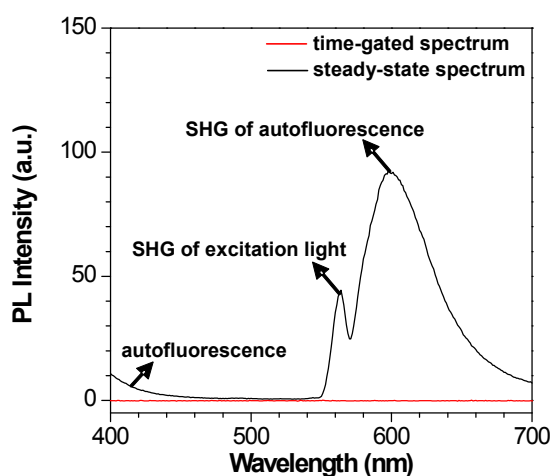

**Fig. S8** Time-gated (red curve) and steady-state (black curve) luminescent spectra of pure plasma with the excitation of 280 nm. The delay time of time-gated spectrum is 0.1 ms.
